# Supplementary material for: Application of a Genetic Risk Score to Racially Diverse Type 1 Diabetes Populations Demonstrates the Need for Diversity in Risk-Modeling
Source: PubMed Central journal article supplement (PMC5852207; doi:10.1038/s41598-018-22574-5), 2018-03-14
Supplement: 41598_2018_22574_MOESM1_ESM.pdf [file 41598_2018_22574_MOESM1_ESM.pdf]

**Application of a Genetic Risk Score to Racially Diverse Type 1 Diabetes Populations  
Demonstrates the Need for Diversity in Risk-Modeling**

Daniel J. Perry, Clive H. Wasserfall, Richard A. Oram, MacKenzie D. Williams, Amanda  
Posgai, Andrew B Muir, Michael J. Haller, Desmond A. Schatz, Mark A. Wallet, Clayton  
E. Mathews, Mark A. Atkinson, Todd M. Brusko

## Supplemental Figures

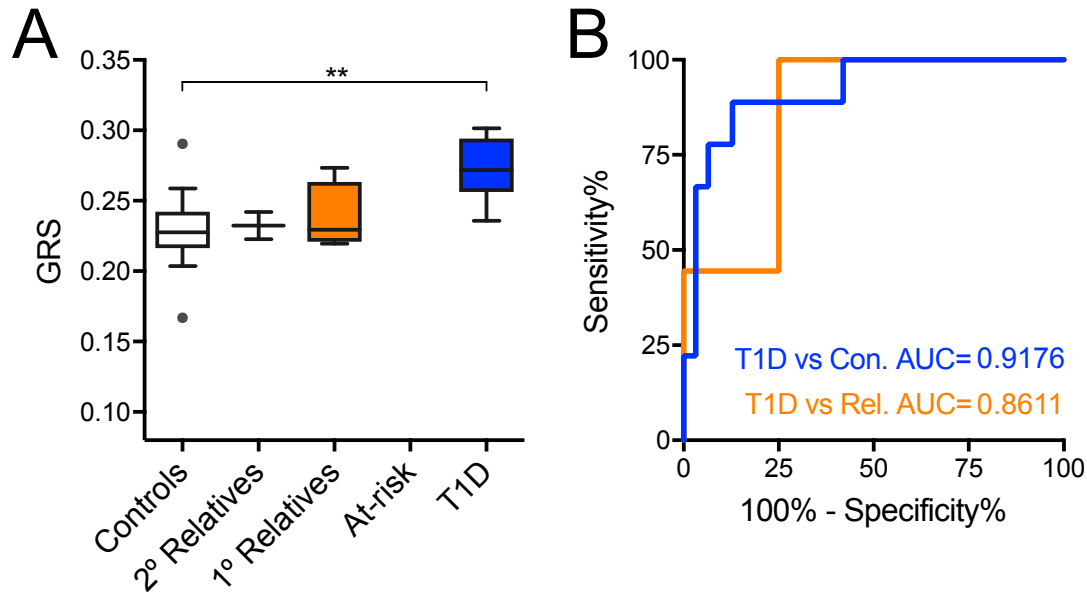

**Figure S1. GRS discriminates Asian American (ASN) subjects with type 1 diabetes and high-risk relatives from controls and lower-risk relatives.** (A) GRS was higher among type 1 diabetes patients (T1D, n=9) compared to controls (n=33), second-degree relatives (2° Relatives, n=2), and first-degree relatives (1° Relatives, n=4). Kruskal-Wallis ANOVA with Dunn's posttest  $^{**}P < 0.01$ . (B) Receiver operating characteristic (ROC) curve shows that the GRS discriminates T1D patients from control subjects (Con.) with 88.89% sensitivity yielding 80.65% specificity (area under curve (AUC)=0.9176) and T1D patients from first-degree relatives (Rel.) with 88.89% sensitivity yielding 75.00% specificity (AUC=0.8611).

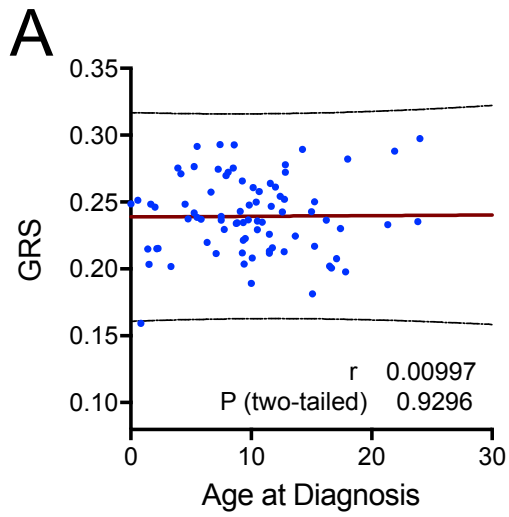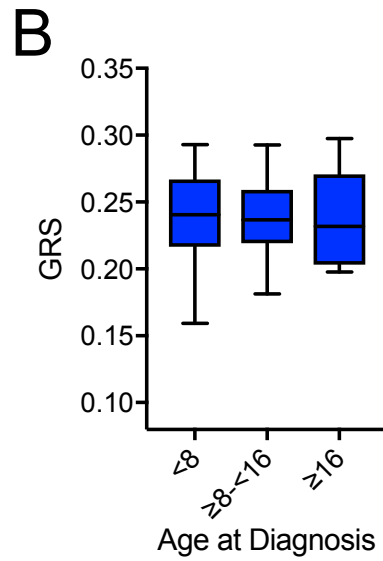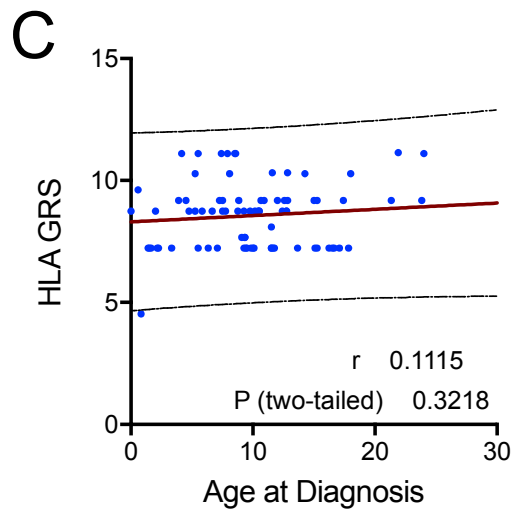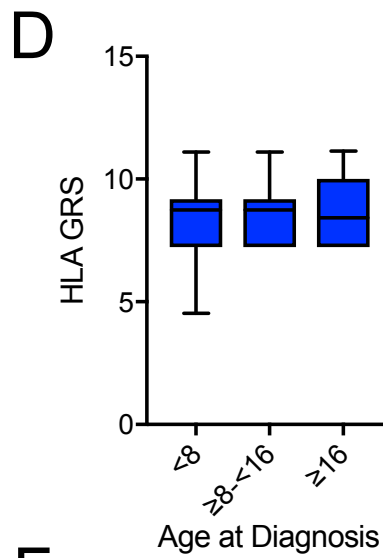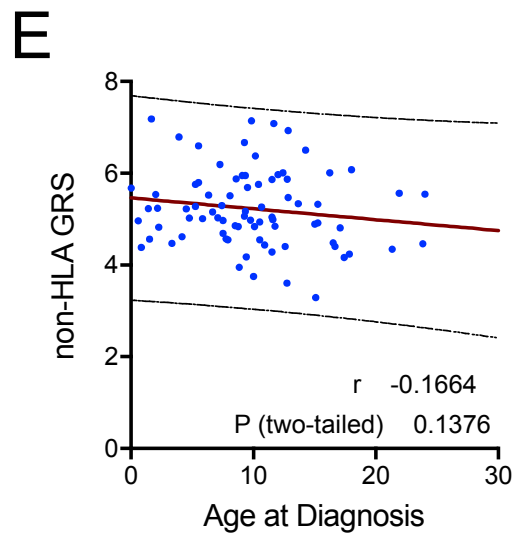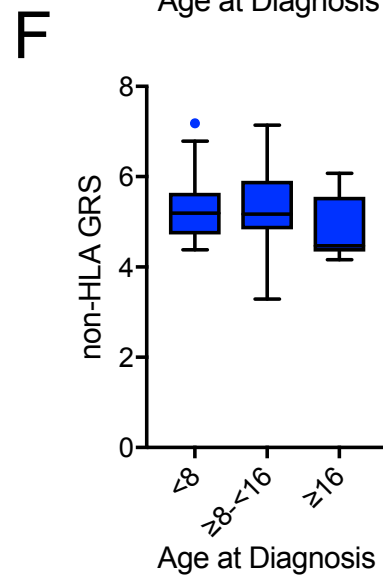

**Figure S2. HLA risk does not impart a genetic association with age of disease onset in the African American (AFR) subset of our cohort.** (A) In AFR subjects, the genetic risk score (GRS) did not significantly correlate with age at diagnosis (linear regression analysis and Pearson correlation coefficient,  $P=0.93$ ,  $r=0.0100$ ). (B) GRS was not significantly different in AFR patients when grouped into under 8, 8-16, and over 16 years old at diagnosis (Kruskal-Wallis ANOVA with Dunn's posttest. (C-D) The HLA-only GRS imparted a similar lack of association with age at diagnosis as the full score in AFR patients (C: linear regression analysis and Pearson correlation coefficient,  $P=0.32$ ,  $r=0.1115$ ; D: Kruskal-Wallis ANOVA with Dunn's posttest. (E-F) The non-HLA GRS showed a weak trend toward negative correlation with age at diagnosis in AFR patients (E: linear regression analysis and Pearson correlation coefficient,  $P=0.14$ ,  $r=-0.1667$ ; F: Kruskal-Wallis ANOVA with Dunn's posttest  $P>0.05$ ). The 99% probability bands for linear regressions are depicted as dotted lines.

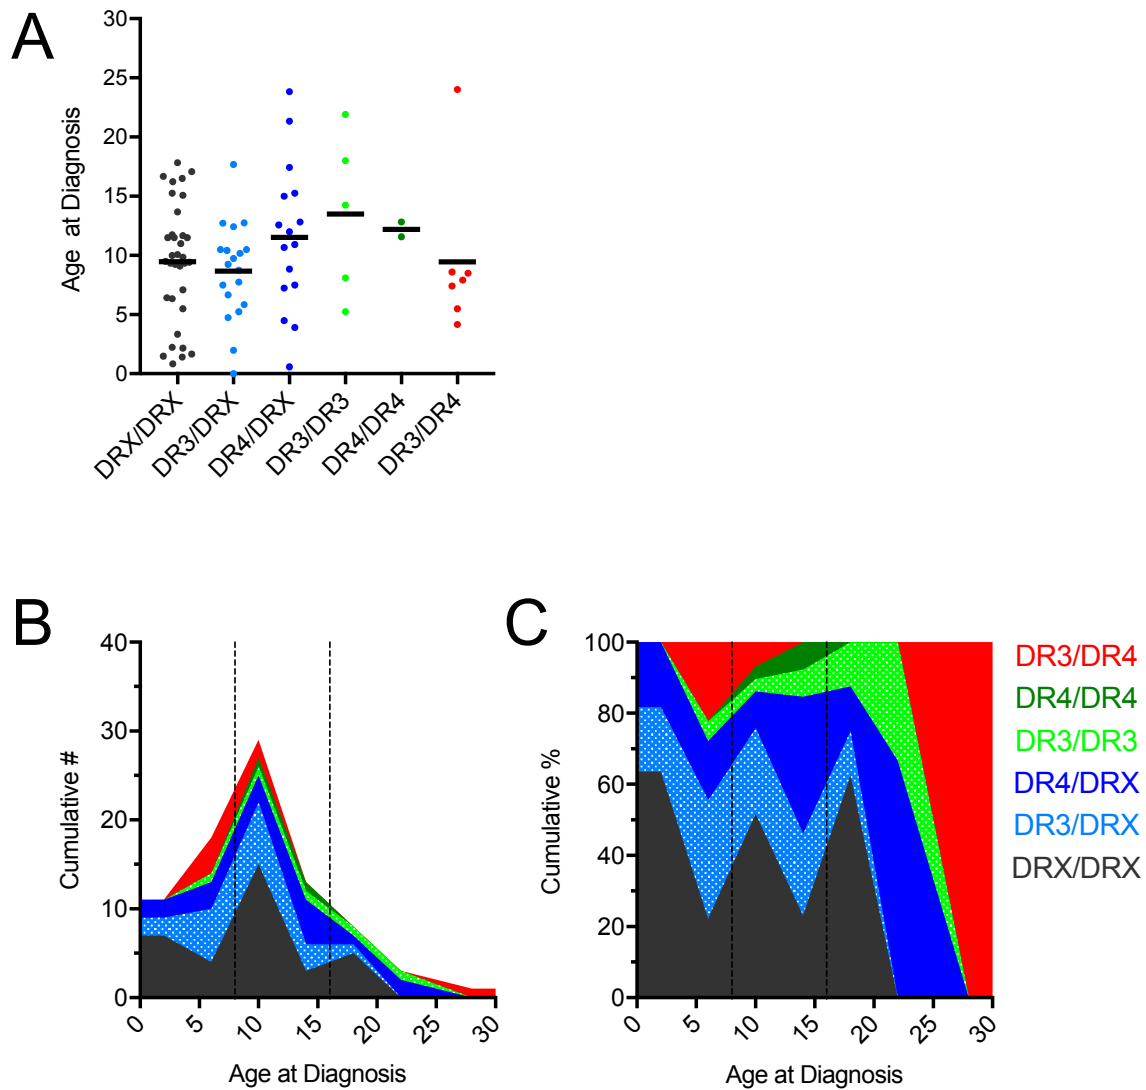

**Figure S3. HLA versus Age at Diagnosis for the African American (AFR) Cohort Subset.** (A) Age at diagnosis was not significantly different among patients grouped by HLA diplotype (Kruskal-Wallis ANOVA with Dunn's posttest  $P > 0.05$ ). (B) Stacked histogram depicting the cumulative number of patients grouped by HLA type versus their ages at diagnosis (4 year binned). (C) Stacked histogram depicting the cumulative percent of patients grouped by HLA type versus their ages at diagnosis (4 year binned). (B-C)

HLA-type is indicated by color as shown within the figure, and 8-year and 16-year age cutoffs are indicated by dashed lines.

## Supplemental Tables

**Supplemental Table 1. Demographic information for the University of Florida Diabetes Institute (UFDI) cohort.** Sample size (n), sex distribution (percent male), and age (years) median (interquartile range) are reported for Caucasian (CAU), African American (AFR), Asian (ASN), and Other (multiple ethnicity [n=49], ethnicity not disclosed [n=93], Pacific Islander/Hawaiian [n=5], Native American/Alaskan [n=5]) subjects within the no-diabetes control subjects, second degree (2<sup>o</sup>) relatives, first degree (1<sup>o</sup>) relatives, multiple autoantibody positive (at-risk) subjects, and type 1 diabetes (T1D) patient cohorts as well as all enrolled subjects regardless of disease status (Totals).

| Disease Status           | CAU  |        |                  | AFR |        |                  | ASN |        |                  | Other |        |                  | Total |        |                  |
|--------------------------|------|--------|------------------|-----|--------|------------------|-----|--------|------------------|-------|--------|------------------|-------|--------|------------------|
|                          | n    | % Male | Age              | n   | % Male | Age              | n   | % Male | Age              | n     | % Male | Age              | n     | % Male | Age              |
| Controls                 | 290  | 52.07  | 23.8 (16.6-33.1) | 63  | 34.92  | 27.1 (16.0-35.7) | 33  | 48.48  | 22.7 (17.7-27.1) | 19    | 42.11  | 25.5 (15.8-36.4) | 405   | 48.64  | 23.9 (16.4-33.3) |
| 2 <sup>o</sup> Relatives | 33   | 36.36  | 18.0 (11.3-43.7) | 28  | 21.43  | 33.5 (15.8-40.1) | 2   | 50.00  | 24.5 (20.4-28.6) | 5     | 20.00  | 49.0 (12.3-52.4) | 68    | 29.41  | 26.8 (12.3-45.0) |
| 1 <sup>o</sup> Relatives | 611  | 40.92  | 26.0 (11.6-41.8) | 118 | 34.75  | 16.7 (10.5-33.9) | 4   | 50.00  | 29.0 (16.6-40.7) | 57    | 36.84  | 17.3 (10.8-37.3) | 790   | 39.75  | 20.8 (11.3-40.4) |
| At-Risk                  | 35   | 60.00  | 15.4 (10.9-34.4) | 6   | 16.67  | 24.4 (13.6-33.7) | 0   | ND     | ND               | 5     | 60.00  | 10.1 (8.2-14.3)  | 46    | 54.35  | 15.3 (10.3-33.8) |
| T1D                      | 478  | 52.51  | 16.2 (12.1-22.0) | 84  | 36.90  | 15.3 (12.4-17.6) | 9   | 66.67  | 15.1 (13.4-19.0) | 66    | 40.91  | 10.5 (5.7-14.9)  | 637   | 49.53  | 15.5 (11.7-19.8) |
| Totals                   | 1447 | 47.34  | 18.4 (12.6-36.2) | 299 | 33.78  | 16.9 (12.2-33.2) | 48  | 52.08  | 20.3 (16.3-27.7) | 152   | 39.47  | 14.0 (9.4-27.4)  | 1946  | 44.78  | 18.0 (12.3-34.8) |

**Supplemental Table 2. Demographic information for UFDI Hispanic cohort.** Sample size (n), sex distribution (percent male), and age (years) median (interquartile range) are reported for Hispanic Caucasian (CAU), Hispanic African American (AFR), and multiple ethnicity or ethnicity not disclosed (Mul or ND) subjects within the no-diabetes control subjects, second degree (2<sup>o</sup>) relatives, first degree (1<sup>o</sup>) relatives, autoantibody positive (at-risk) subjects, and type 1 diabetes (T1D) patient cohorts. ND indicates no data (n=0).

| Disease Status           | CAU |        |                  | AFR |        |                  | Mul or ND |        |                  |
|--------------------------|-----|--------|------------------|-----|--------|------------------|-----------|--------|------------------|
|                          | n   | % Male | Age              | n   | % Male | Age              | n         | % Male | Age              |
| Controls                 | 37  | 59.46  | 21.3 (14.6-31.6) | 1   | 100.00 | 42.0 (42.0-42.0) | 5         | 20.00  | 33.4 (24.9-36.4) |
| 2 <sup>o</sup> Relatives | 4   | 50.00  | 35.0 (27.9-43.6) | 0   | ND     | ND               | 3         | 0.00   | 49.0 (29.3-55.3) |
| 1 <sup>o</sup> Relatives | 104 | 44.23  | 17.0 (10.2-38.4) | 3   | 33.33  | 10.6 (9.8-14.8)  | 22        | 36.36  | 34.8 (13.9-44.9) |
| At-Risk                  | 5   | 40.00  | 18.2 (17.3-33.8) | 1   | 0.00   | 15.5 (15.5-15.5) | 2         | 100.00 | 8.2 (8.2-8.2)    |
| T1D                      | 45  | 46.67  | 15.6 (11.6-19.3) | 4   | 25.00  | 10.7 (10.2-12.1) | 16        | 37.50  | 15.0 (12.7-17.5) |
| Totals                   | 195 | 47.69  | 17.1 (10.7-34.5) | 9   | 33.33  | 10.9 (10.4-15.6) | 48        | 35.42  | 18.3 (12.8-38.2) |

**Supplemental Table 3. Single nucleotide polymorphisms (SNPs) included in genetic risk score (GRS) calculations.** The locus within the human genome is noted for each SNP along with associated candidate gene(s), risk allele on the forward strand (FWD), odds ratio (OR) for type 1 diabetes, p-value, and references.

| Locus    | SNP                    | Candidate Gene(s)                | Risk Allele (FWD) | OR    | p-value   | Reference |
|----------|------------------------|----------------------------------|-------------------|-------|-----------|-----------|
| 6p21.32  | rs2187668<br>rs7454108 | DR3-DQ2<br>DR4-DQ8<br>diplotypes | DR3/4             | 48.18 | ND        | (9)       |
|          |                        |                                  | DR4/4             | 21.98 | ND        | (9)       |
|          |                        |                                  | DR3/3             | 21.12 | ND        | (9)       |
|          |                        |                                  | DR4/X             | 7.03  | ND        | (9)       |
|          |                        |                                  | DR3/X             | 4.53  | ND        | (9)       |
|          |                        |                                  | DRX/X             | 1.00  | ND        | (9)       |
| 6p21.32  | rs3129889              | DR15-DQ6 haplotype               | X                 | 14.88 | ND        | (9)       |
| 6p21.32  | rs1264813              | A24 haplotype                    | A24               | 1.54  | ND        | (9)       |
| 6p21.32  | rs2395029              | B57 haplotype                    | X                 | 2.50  | ND        | (8; 9)    |
| 1p13.2   | rs2476601              | PTPN22                           | A                 | 1.89  | 1.1E-122  | (42)      |
| 1q32.1   | rs3024505              | IL10                             | G                 | 1.16  | 6.4E-08   | (42)      |
| 2q24.2   | rs1990760              | IFIH1                            | T                 | 1.17  | 5.84E-17  | (42)      |
| 2q33.2   | rs3087243              | CTLA4                            | G                 | 1.19  | 7.4E-21   | (42)      |
| 3p21.31  | rs11711054             | CCR5                             | A                 | 1.18  | 4.6E-08   | (42)      |
| 4q27     | rs17388568             | ADAD1 IL2 IL21                   | A                 | 1.13  | 1.06E-09  | (42)      |
| 6q15     | rs11755527             | BACH2                            | G                 | 1.13  | 5.4E-08   | (43)      |
| 6q25.3   | rs1738074              | TAGAP                            | C                 | 1.09  | 6.0E-03   | (44)      |
| 9p24.2   | rs1574285              | GLIS3                            | G                 | 1.12  | 1.03E-09  | (42)      |
| 10p15.1  | rs12722495             | IL2RA                            | T                 | 1.6   | 2.84E-39  | (42)      |
| 10p15.1  | rs2104286              | IL2RA                            | T                 | 1.24  | 5.98E-23  | (42)      |
| 11p15.5  | rs689                  | INS INS-IGF2 TH                  | T                 | 2.39  | 1.11E-233 | (42)      |
| 12q13.2  | rs2292239              | ERBB3                            | T                 | 1.3   | 6.46E-19  | (45)      |
| 12q14.1  | rs10877012             | CYP27B1                          | G                 | 1.21  | 9.6E-04   | (46)      |
| 12q24.12 | rs653178               | ATXN2 SH2B3 NAA25                | C                 | 1.3   | 1.56E-44  | (42)      |
| 15q25.1  | rs3825932              | CTSH                             | C                 | 1.16  | 1.16E-07  | (43)      |
| 16p11.2  | rs4788084              | NUPR1 IL27                       | C                 | 1.12  | 1.03E-09  | (42)      |
| 16q23.1  | rs7202877              | CTRB2 CTRB1                      | G                 | 1.28  | 3.1E-15   | (47)      |
| 17q12    | rs2290400              | GSDMB ORMDL3                     | C                 | 1.15  | 5.5E-13   | (47)      |
| 17q21.2  | rs7221109              | CCR7 SMARCE1                     | T                 | 1.05  | 1.3E-09   | (47)      |
| 18p11.21 | rs1893217              | PTPN2                            | G                 | 1.21  | 1.2E-15   | (42)      |
| 18q22.2  | rs763361               | CD226                            | T                 | 1.12  | 8.03E-11  | (42)      |
| 19p13.2  | rs2304256              | TYK2                             | C                 | 1.16  | 4.13E-09  | (48)      |
| 19q13.33 | rs602662               | FUT2                             | A                 | 1.12  | 4.23E-05  | (49)      |
| 20p13    | rs2281808              | SIRPG SIRPB1                     | C                 | 1.11  | 1.2E-11   | (47)      |
| 21q22.3  | rs11203203             | UBASH3A                          | A                 | 1.16  | 2.91E-15  | (42)      |
| 22q12.3  | rs229541               | RAC2                             | G                 | 1.11  | 1.8E-08   | (42)      |
| Xq28     | rs2664170              | GAB3 X                           | G                 | 1.16  | 7.8E-09   | (47)      |



**Supplemental Table 4. Comparison of the genetic risk score (GRS) of the University of Florida Diabetes Institute (UFDI) cohort to the Wellcome Trust Case Control Consortium (WTCCC).** GRS mean, standard deviation (SD), and 95% confidence interval (CI) are shown for Caucasian control and type 1 diabetes (T1D) subjects from the UFDI cohort as a comparison to the previously reported GRS of the WTCCC as calculated by Oram et al. and Patel et al.

| Group    | GRS of the UFDI Cohort |             | GRS of the WTCCC |             | References |
|----------|------------------------|-------------|------------------|-------------|------------|
|          | (Mean ± SD)            | (95% CI)    | (Mean ± SD)      | (95% CI)    |            |
| Controls | 0.231±0.03             | 0.226-0.235 | 0.229            | 0.228-0.230 | (10)       |
| T1D      | 0.277±0.03             | 0.274-0.279 | 0.279±0.03       | 0.278-0.280 | (9; 10)    |

**Supplemental Table 5. HLA versus Age at Diagnosis for the African American (AFR) Cohort Subset.** The proportion of patients diagnosed age <8, age ≥8 to <16, and age ≥16 years within each HLA category is reported as number (N) and as odds ratio (OR). Fisher's exact test was used to determine if age at diagnosis was significantly different for each HLA type ( $P>0.05$  all).

| Age at Diagnosis | DRX/DRX |        | DR3/DRX |        | DR4/DRX |        | DR3/DR3 |        | DR4/DR4 |        | DR3/DR4 |        |
|------------------|---------|--------|---------|--------|---------|--------|---------|--------|---------|--------|---------|--------|
|                  | N       | (OR)   | N       | (OR)   | N       | (OR)   | N       | (OR)   | N       | (OR)   | N       | (OR)   |
| <8               | 11      | (0.82) | 8       | (1.49) | 5       | (0.81) | 1       | (0.45) | 0       | (0.00) | 4       | (2.72) |
| 8-16             | 18      | (1.17) | 10      | (1.11) | 8       | (0.97) | 2       | (0.63) | 2       | (n/a)  | 2       | (0.36) |
| >16              | 5       | (1.03) | 1       | (0.27) | 3       | (1.49) | 2       | (4.53) | 0       | (0.00) | 1       | (0.98) |
